# Supplementary material for: Indigenous peoples and marine protected area governance: A Mi’kmaq and Atlantic Canada case study
Source: Atypon-hosted journal article supplement (doi:10.1139/facets-2021-0128), 2022-01-01
Supplement: facets-2021-0128_supplement2.pdf [file facets-2021-0128_supplement2.pdf]

May 13, 2019

Magena Warrior  
Marine Affairs  
Dalhousie University  
Halifax, Nova Scotia B3H 4R2

Dear Magena:

I wish to inform you that the Mi'kmaw Ethics Watch committee has reviewed and approved "*Enhancing the Marine Protected Area process in Atlantic Canada to improve Indigenous Engagement within MPA governance*"

As your project moves forward with the approval of the Mi'kmaw Ethics Watch, I must note that individual communities have their own perspective on research projects and it is your responsibility to consult them to ensure that you meet any further ethical requirements. Governments, universities, granting agencies, and the like also have ethical processes to which you might have to conform.

When your project is completed, the Mi'kmaq Resource Centre at Unama'ki College would be pleased to accept the results in a form that could be made available to students and other researchers (if it is appropriate to disseminate them). Our common goal is to foster a better understanding of the Indigenous knowledges.

If you have any questions concerning the Mi'kmaw Ethics Watch review of your project please do not hesitate to contact me and I will forward them to the committee members.

Sincerely,



Stephen J. Augustine,  
Associate Vice President  
Indigenous Affairs & Unama'ki College  
Cape Breton University

SJA/km
