# Supplementary material for: Indigenous peoples and marine protected area governance: A Mi’kmaq and Atlantic Canada case study
Source: Atypon-hosted journal article supplement (doi:10.1139/facets-2021-0128), 2022-01-01
Supplement: facets-2021-0128_supplement3.pdf [file facets-2021-0128_supplement3.pdf]

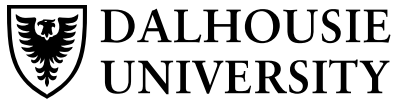

## Appendix D CONSENT FORM

**Project title:** *Understanding Indigenous Engagement in MPA Governance: Mi'kmaq and Eastern Shore Islands Case Study*

**Lead researcher:** Magena Warrior, B.Sc.  
Master of Marine Management Candidate  
Marine Affairs Program  
Dalhousie University  
Halifax, Nova Scotia, Canada  
Tel: (250) 217 7673  
Email: [Magena.warrior@dal.ca](mailto:Magena.warrior@dal.ca)

**Supervisor:** Lucia M. Fanning, Professor  
Marine Affairs Program  
Room 800, Life Sciences Centre  
Dalhousie University  
Halifax, Nova Scotia, Canada  
Tel: (902) 494-8390  
[email: lucia.fanning@dal.ca](mailto:lucia.fanning@dal.ca)

**Funding provided by:**

Funding for this research is provided by the Natural Sciences and Engineering Research Council (NSERC).

**Introduction**

We invite you to take part in a research study being conducted by me, Magena Warrior, a Masters student at Dalhousie University as part of my Marine Management degree program. Choosing whether or not to take part in this research is entirely your choice. There will be no impact on your employment or the services you receive if you decide not to participate in the research. The information below tells you about what is involved in the research, what you will be asked to do and about any benefit, risk, inconvenience or discomfort that you might experience.

**Purpose and Outline of the Research Study**

The purpose of this study is to provide a deeper understanding of the current Indigenous engagement processes in place within MPA governance in Canada. The Eastern Shore Islands “Area of Interest” (AOI) MPA process will be used as a case study to explore Mi'kmaq, government and stakeholder perspectives on Mi'kmaq involvement in MPA governance, and assess barriers and opportunities to integrating Mi'kmaq values, interests and knowledge within

MPA governance. I will be conducting a series of 12-15 interviews with indigenous, federal and provincial governments, and non-government organizations representatives. With these interviews I hope to achieve a deeper understanding of the consultation processes within the MPA process and identify opportunities that improve legitimacy, crown-indigenous relationships, and enhance MPA governance that respects Indigenous rights and values.

### **Researcher**

The principle investigator is Magena Warrior, Master of Marine Management Candidate at Dalhousie University in Halifax, Nova Scotia. My supervisor is, Dr. Lucia Fanning.

### **Who Can Take Part in the Research Study**

Participants that are involved in the MPA consultation processes of the Eastern Shore Islands AOI are invited to take part in this study. This includes members of the Mi'kmaw Nation, Mi'kmaw Nation representatives, federal and provincial representatives, and non-governmental organization representatives (fishery, conservation), and other members of the Advisory Committee and Working Groups.

### **What You Will Be Asked to Do**

You will be asked to complete a single interview either in person, over the phone or by video conferencing. Prior to the interview, the researcher will review the consent form and request your signature. For telephone or video conferencing interviews, an email acknowledging your consent is required.

The interview will consist of a series of semi-structured questions and is expected to take approximately one hour to complete. You will have the opportunity to provide clarification of your responses for use in the study following the interview. The interview will be conducted in one visit, however, as the project develops there may be another interview requested. Phone calls and emails will be used to clarify responses if needed.

### **Compensation / Reimbursement**

As a participant of this study, a gas card of 25\$ will be provided to compensate for any travel expenses. In addition, a small gift will be offered prior to or at the interview date.

### **Possible Benefits, Risks and Discomforts**

The likelihood of any direct benefits to participating in this study is not assumed, however hopefully you will feel positively about your contribution to the study.

It is anticipated that this research will contribute to enhancing marine protected area processes and improve MPA governance and indigenous participation within federal government initiatives.

Risks: Every effort was made to reduce the risk of your participation in the study. Risks to participants include discomfort in answering a question, should the participant choose to answer. This risk is minimal due to the nature of the questions, which could occur in everyday conversations. There is a risk of participants feeling uncomfortable with the meeting locations. To mitigate this risk, participants will be informed before the interview that they can choose to

not answer the questions. When arranging interview locations, participants will be given option to choose the location or have the interview conducted over the phone. The responses you provide should be based on your professional expertise.

### **How your information will be protected**

**Anonymity:** Anonymity cannot be guaranteed, but your name will not be identified in the research. Options for disclosure of quotes is at the discretion of the participant.

**Confidentiality:** The knowledge and information that you share will remain confidential. Participants will be assigned a randomly generated alpha-numeric identifier or pseudonym. Digital copies (files) of the interview notes and transcripts will be password protected and stored on my password protected computer. Paper versions will also have the same coding and will be stored in a locked filing cabinet. The data will be securely saved for five years after publication date and then destroyed. Should you wish to have your responses removed from the analysis, the researcher must be contacted, and it will be removed prior to submission or wider research dissemination.

### **If You Decide to Stop Participating**

You are free to stop the interview process at any time during the interview and to withdraw from the study. If after completing the interview, you decide to withdraw from the study, you can also decide whether you want any of the information that you have contributed up to that point to be removed or if you will allow us to use that information. Please be aware that you should let the researcher know of your decision to withdraw from the study within 4 weeks of the interview being conducted as after that time data will not be able to be removed from the study because it will already be analyzed. However, the results will be aggregated so individual participant's results will not be disseminated.

### **How to Obtain Results**

We will provide you with a short description of group results when the study is finished. Should you wish to receive a copy of the entire study once completed, please indicate this when signing the consent form.

### **Questions**

We are happy to talk with you about any questions or concerns you may have about your participation in this research study. Please contact Magena Warrior at 250-217-7673, [magena.warrior@dal.ca](mailto:magena.warrior@dal.ca) or Lucia Fanning at 902-494-8390, [lucia.fanning@dal.ca](mailto:lucia.fanning@dal.ca) at any time with questions, comments, or concerns about the research study (if you are calling long distance, please call collect). We will also tell you if any new information comes up that could affect your decision to participate.

If you have any ethical concerns about your participation in this research, you may also contact Research Ethics, Dalhousie University at (902) 494-1462, or email: [ethics@dal.ca](mailto:ethics@dal.ca) (and reference REB file # 20XX-XXXX).

## Signature Page

**Project Title:** Enhancing the Marine Protected Area developmental processes in Atlantic Canada to improve MPA governance and Indigenous Participation

**Lead Researcher:** Magena Warrior, B.Sc.  
Master of Marine Management Candidate  
Marine Affairs Program  
Dalhousie University  
Halifax, Nova Scotia, Canada  
Tel: (250) 217 7673  
Email: magena.warrior@dal.ca

I have read the explanation about this study. I have been given the opportunity to discuss it and my questions have been answered to my satisfaction. I understand that I have been asked to take part in an interview that will occur at a location acceptable to me. I agree to take part in this study. I realize that my participation is voluntary and that I am free to withdraw from the study at any time, until 4 weeks after my interview is completed.

|      |           |      |
|------|-----------|------|
|      |           |      |
| Name | Signature | Date |

Please check all that apply:

- I agree that my interview may be audio-recorded      Yes   No
- I agree that I may be contacted for a follow-up interview      Yes   No
- I agree that direct quotes from my interview may be used without identifying me      Yes   No
- I would like to receive a copy of the entire study      Yes   No

|      |           |      |
|------|-----------|------|
|      |           |      |
| Name | Signature | Date |

|                                                                                             |
|---------------------------------------------------------------------------------------------|
| <p><b>Participant contact information:</b></p> <p><b>Phone # :</b></p> <p><b>Email:</b></p> |
|---------------------------------------------------------------------------------------------|
